# Supplementary material for: Change in Caffeine Consumption after Pandemic (CCAP-Study) among University Students: A Cross-Sectional Study from Italy
Source: MDPI journal article supplement (doi:10.3390/nu16081131), 2024-04-11
Supplement: s1 [file s1]

**Table S1.** Reasons of energy drinks and energizing supplements consumption.

| <b>Reasons of Energy drinks consumption</b> | <b>n</b> | <b>%</b> | <b>Reasons of supplement consumption</b> | <b>n</b> | <b>%</b> |
|---------------------------------------------|----------|----------|------------------------------------------|----------|----------|
| To be more concentrated during study        | 38       | 31.1     | I need more energy                       | 49       | 30.4     |
| I like the taste                            | 28       | 23.0     | I like the taste                         | 48       | 29.8     |
| I need more energy                          | 21       | 17.2     | To be more concentrated during study     | 32       | 19.9     |
| To stay awake                               | 18       | 14.8     | To stay awake                            | 18       | 11.2     |
| To improve my sport performances            | 11       | 9.0      | To improve my sport performances         | 10       | 6.2      |
| Others                                      | 6        | 4.9      | Others                                   | 4        | 5.5      |
